# Supplementary material for: Germination of Oat and Quinoa and Evaluation of the Malts as Gluten Free Baking Ingredients
Source: Springer Nature journal article supplement (doi:10.1007/s11130-013-0335-3), 2013-02-05
Supplement: 11130_2013_335_MOESM1_ESM.pdf [file 11130_2013_335_MOESM1_ESM.pdf]

## Online Resource 1

*Article name:* Germination of oat and quinoa and evaluation of the malts as gluten free baking ingredients

*Journal name:* Plant Foods for Human Nutrition

*Authors:* Outi E. Mäkinen, Emanuele Zannini, Elke, K. Arendt\*

*Affiliation:* Department of Food Science, Food Technology and Nutrition, National University of Ireland, Cork, Ireland

*Corresponding author (\*) e-mail:* [e.arendt@ucc.ie](mailto:e.arendt@ucc.ie)

### Online Resource 1 Recipes used in the baking trials.

| Ingredient           | Baker's %<br>(%) | Control<br>(g) | 0.5% malt<br>(g) | 0.75% malt<br>(g) | 1% malt<br>(g) | 2% malt<br>(g) | 2.5% malt<br>(g) | 5% malt<br>(g) |
|----------------------|------------------|----------------|------------------|-------------------|----------------|----------------|------------------|----------------|
| <i>Rice flour</i>    | 50               | 300            | 298.5            | 297.75            | 297            | 294            | 292.5            | 285            |
| <i>Potato starch</i> | 50               | 300            | 298.5            | 297.75            | 297            | 294            | 292.5            | 285            |
| Malt                 | 0                | 0              | 3                | 4.5               | 6              | 12             | 15               | 30             |
| WPI                  | 10               | 60             | 60               | 60                | 60             | 60             | 60               | 60             |
| Vegetable oil        | 6                | 36             | 36               | 36                | 36             | 36             | 36               | 36             |
| Sugar                | 2                | 12             | 12               | 12                | 12             | 12             | 12               | 12             |
| Salt                 | 2                | 12             | 12               | 12                | 12             | 12             | 12               | 12             |
| Dry yeast            | 2                | 12             | 12               | 12                | 12             | 12             | 12               | 12             |
| Xanthan gum          | 0.3              | 1.8            | 1.8              | 1.8               | 1.8            | 1.8            | 1.8              | 1.8            |
| HPMC                 | 0.3              | 1.8            | 1.8              | 1.8               | 1.8            | 1.8            | 1.8              | 1.8            |
| Water                | 90               | 540            | 540              | 540               | 540            | 540            | 540              | 540            |

Dough yield 212.6
