# Supplementary material for: Germination of Oat and Quinoa and Evaluation of the Malts as Gluten Free Baking Ingredients
Source: Springer Nature journal article supplement (doi:10.1007/s11130-013-0335-3), 2013-02-05
Supplement: 11130_2013_335_MOESM2_ESM.pdf [file 11130_2013_335_MOESM2_ESM.pdf]

## Online Resource 2

*Article name:* Germination of oat and quinoa and evaluation of the malts as gluten free baking ingredients

*Journal name:* Plant Foods for Human Nutrition

*Authors:* Outi E. Mäkinen, Emanuele Zannini, Elke, K. Arendt\*

*Affiliation:* Department of Food Science, Food Technology and Nutrition, National University of Ireland, Cork, Ireland

*Corresponding author (\*) e-mail:* [e.arendt@ucc.ie](mailto:e.arendt@ucc.ie)

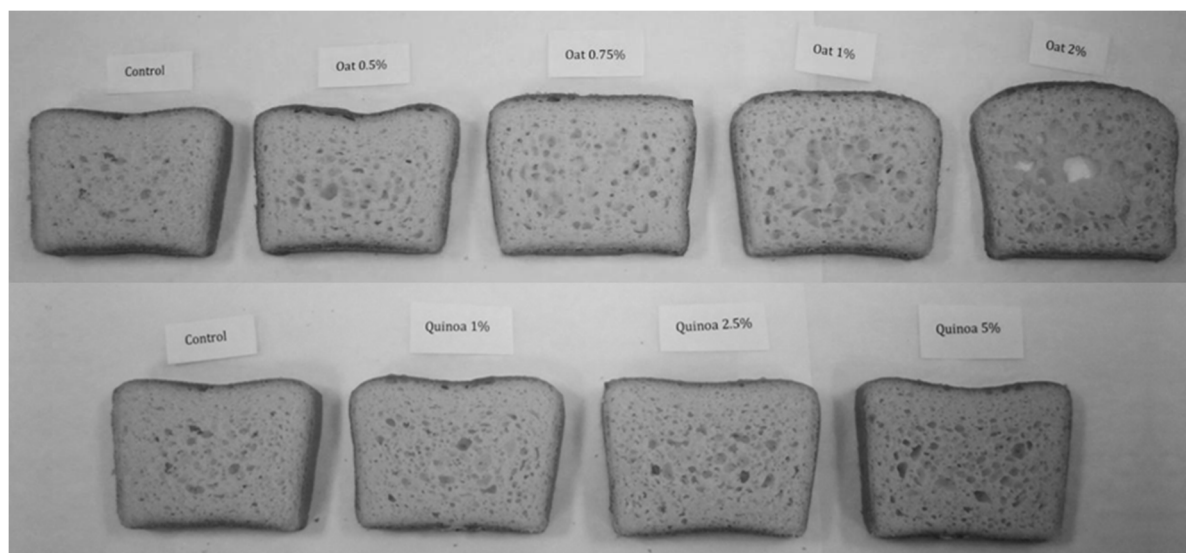

**Online Resource 2** Photos of bread slices with added oat (1<sup>st</sup> row) and quinoa (2<sup>nd</sup> row)
