# Supplementary material for: Germination of Oat and Quinoa and Evaluation of the Malts as Gluten Free Baking Ingredients
Source: Springer Nature journal article supplement (doi:10.1007/s11130-013-0335-3), 2013-02-05
Supplement: 11130_2013_335_MOESM3_ESM.pdf [file 11130_2013_335_MOESM3_ESM.pdf]

### Online Resource 3

*Article name:* Germination of oat and quinoa and evaluation of the malts as gluten free baking ingredients

*Journal name:* Plant Foods for Human Nutrition

*Authors:* Outi E. Mäkinen, Emanuele Zannini, Elke, K. Arendt\*

*Affiliation:* Department of Food Science, Food Technology and Nutrition, National University of Ireland, Cork, Ireland

*Corresponding author (\*) e-mail:* [e.arendt@ucc.ie](mailto:e.arendt@ucc.ie)

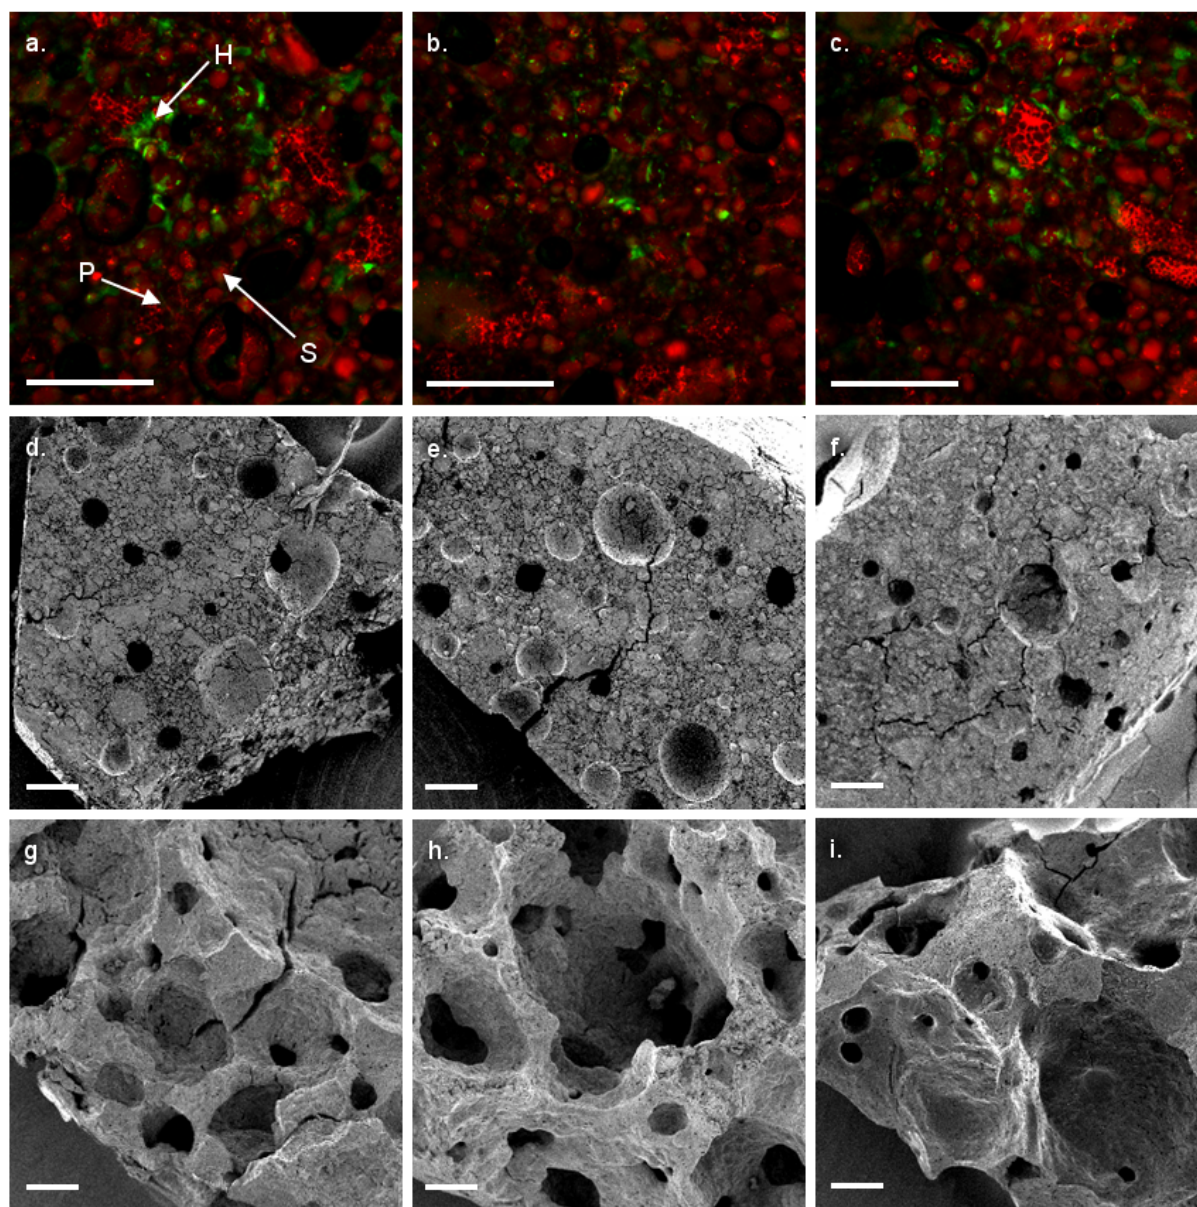

**Online Resource 3** CLSM micrographs of batters after proofing (a-c) and SEM micrographs of batter after proofing (d-f-i) and 1 min baking (g-i). Columns starting from left: control; 2% oat malt and 2.5% quinoa malt; Letters indicating protein (P), starch (S) and hydrocolloids (H); Bars 200  $\mu$ m
